# Supplementary material for: Epigenetically silenced apoptosis-associated tyrosine kinase (AATK) facilitates a decreased expression of Cyclin D1 and WEE1, phosphorylates TP53 and reduces cell proliferation in a kinase-dependent manner
Source: PubMed Central journal article supplement (PMC9750878; doi:10.1038/s41417-022-00513-x), 2022-07-28
Supplement: 41417_2022_513_MOESM1_ESM.pdf [file 41417_2022_513_MOESM1_ESM.pdf]

**Supplementary table S1: List of primers**

| <b>CoBRA-PCR</b>                               |                                 |
|------------------------------------------------|---------------------------------|
| 1. Upper                                       | GTTGGGTGATGYGGYGGTT             |
| 2. Upper                                       | GTTTTTTTTTAATTTTAGTTTYGTTTTAGTT |
| 1. and 2. Lower                                | ATTATACTAAAACCCAAAACCTACCC      |
| <b>Pyrosequencing -PCR</b>                     |                                 |
| 1. Upper                                       | GTTGGGTGATGYGGYGGTT             |
| 2. Upper                                       | GTTTTTTTTTAATTTTAGTTTYGTTTTAGTT |
| 1. and 2. Lower (with biotin tag)              | ATTATACTAAAACCCAAAACCTACCC      |
| <b>Expression analysis</b>                     |                                 |
| ANXA1                                          | GCAAGAAGGTAGAGATAAAGACACT       |
|                                                | GCGACATCCGAGGATGGATT            |
| NOVA1                                          | GGACCAATACGGGCGAAGAC            |
|                                                | AGACAGCTTGATGGTGGCTC            |
| CCND1                                          | AAGTTGCAAAGTCCTGGAGCC           |
|                                                | GATGGTTTCCACTTCGCAGC            |
| WEE1                                           | CACACGCCAAGAGTTTGC              |
|                                                | CACTTGAGGAGTCTGTGCGCA           |
| GAPDH                                          | TGGAGAAGGCTGGGGCTCAT            |
|                                                | GACCTTGCCAGGGGTGCTA             |
| $\beta$ -ACTIN                                 | CCTCCTTCCTGGGCATGGAGTC          |
|                                                | CGGAGTACTTGCCTCAGGAGGA          |
| AATK                                           | TGGCCTGGCTCACTGCAAGTACAG        |
|                                                | CCCAGATGGTCACGCCCAGG            |
| <b>Genomic region targeted via CRISPR/CAS9</b> |                                 |
| gDNA AATK                                      | GGCGGGGAAAGGGTTAATTTC           |
|                                                | CTCCAAGCCCCCTTCTGTGTC           |

Primer sequences are listed in 5'-3' direction
