# Supplementary material for: Epigenetically silenced apoptosis-associated tyrosine kinase (AATK) facilitates a decreased expression of Cyclin D1 and WEE1, phosphorylates TP53 and reduces cell proliferation in a kinase-dependent manner
Source: PubMed Central journal article supplement (PMC9750878; doi:10.1038/s41417-022-00513-x), 2022-07-28
Supplement: 41417_2022_513_MOESM3_ESM.pdf [file 41417_2022_513_MOESM3_ESM.pdf]

## **AAKT Interactomics (AMS114)**

### **LC-MSMS Parametrization**

This file is produced using R and the package openxlsx .

#### **Tab Index**

|                      |                                                                                                                                                                                                                                 |
|----------------------|---------------------------------------------------------------------------------------------------------------------------------------------------------------------------------------------------------------------------------|
| LC-MSMS Parameters:  | LC-MS/MS parameters extracted from ThermoFisher Scientific RAW files using (Kiweler, Looso, and Graumann, 2019).                                                                                                                |
| LC Gradient:         | Chromatography gradient(s) extracted from ThermoFisher Scientific RAW files using (Kiweler, Looso, and Graumann, 2019).                                                                                                         |
| MaxQuant Parameters: | Parametrization of the MaxQuant suite of algorithms (Cox and Mann, 2008; Cox, Hein, Lubner, Paron, Nagaraj, and Mann, 2014; Cox, Neuhauser, Michalski, Scheltema, Olsen, and Mann, 2011) as provided in the paramters.txt file. |

#### **Bibliography**

[1] J. Cox, M. Y. Hein, C. A. Lubner, et al. "Accurate Proteome-wide Label-free Quantification by Delayed Normalization and Maximal Peptide Ratio Extraction, Termed MaxLFQ". In: *Molecular & Cellular Proteomics* 13.9 (2014), pp. 2513-2526. DOI: 10.1074/mcp.M113.031591.

[2] J. Cox and M. Mann. "MaxQuant enables high peptide identification rates, individualized p.p.b.-range mass accuracies and proteome-wide protein quantification". In: *Nature Biotechnology* 26.12 (2008), pp. 1367-1372. DOI: 10.1038/nbt.1511.

[3] J. Cox, N. Neuhauser, A. Michalski, et al. "Andromeda: A Peptide Search Engine Integrated into the MaxQuant Environment". In: *Journal of Proteome Research* 10.4 (2011), pp. 1794-1805. DOI: 10.1021/pr101065j.

[4] M. Kiweler, M. Looso, and J. Graumann. "MARMoSET – Extracting Publication-Ready Mass Spectrometry Metadata from RAW Files". In: *Molecular & Cellular Proteomics* (Jan. 01, 2019), p. mcp.TIR119.001505. DOI: 10.1074/mcp.TIR119.001505.

| Term                                                       | Value                         |
|------------------------------------------------------------|-------------------------------|
| High Performance Liquid Chromatography (HPLC) Instrument   | Thermo EASY-nLC               |
| HPLC Vendor                                                | Thermo Scientific             |
| Injected Sample Volume                                     | 4.00                          |
| Mass Spectrometer (MS)                                     | Q Exactive HF - Orbitrap MS   |
| MS Vendor                                                  | Thermo Scientific             |
| MS Model                                                   | QExactive HF                  |
| MS Instrument Software                                     | Xcalibur                      |
| MS Instrument Software Version                             | 2.9-290033/2.9.0.2926         |
| MS Ionization Type                                         | Electrospray Ionization (ESI) |
| MS Electrospray Voltage                                    | 2000                          |
| MS Heated Capillary Temperature                            | 310                           |
| MS Analyzer Precursor Ion Spectrum (MS1)                   | orbitrap                      |
| MS Data Type Precursor Ion Spectrum (MS1)                  | Profile                       |
| MS Micro Spectra Precursor Ion Spectrum (MS1)              | 1                             |
| MS Resolution Precursor Ion Spectrum (MS1)                 | 60,000                        |
| MS Resolution m/z Precursor Ion Spectrum (MS1)             | 200 m/z                       |
| MS Mass Range Precursor Ion Spectrum (MS1)                 | 300 to 1650 m/z               |
| MS Ion Target Value Precursor Ion Spectrum (MS1)           | 3e6                           |
| MS Max. Injection Time Precursor Ion Spectrum (MS1)        | 15 ms                         |
| MS Analyzer Fragment Ion Spectrum (MS2)                    | orbitrap                      |
| MS Data Type Fragment Ion Spectrum (MS2)                   | Profile                       |
| MS Micro Spectra Fragment Ion Spectrum (MS2)               | 1                             |
| MS Fixed First m/z Fragment Ion Spectrum (MS2)             | -                             |
| MS Isolation Window Width Fragment Ion Spectrum (MS2)      | 1.2 m/z                       |
| MS Isolation Window Offset Fragment Ion Spectrum (MS2)     | 0.0 m/z                       |
| MS Fragmentation Mode (MS2)                                | HCD                           |
| MS Normalized Collision Energy Fragment Ion Spectrum (MS2) | nce: 28                       |
| MS Resolution Fragment Ion Spectrum (MS2)                  | 15,000                        |
| MS Resolution m/z Fragment Ion Spectrum (MS2)              | 200 m/z                       |
| MS Ion Target Value Fragment Ion Spectrum (MS2)            | 5e5                           |
| MS Max. Injection Time Fragment Ion Spectrum (MS2)         | 15 ms                         |
| MS Loop Count (Top n) Fragment Ion Spectrum (MS2)          | 20                            |
| MS Charge States Excluded from Fragmentation               | unassigned, 1, >8             |
| MS Minimum Peak Intensity for Fragmentation                | 1.0e5                         |
| MS Fragmentation Trigger on Peak Apex                      | -                             |
| MS Dynamic Exclusion Length                                | 20.0 s                        |
| MS Isotopologue Exclusion                                  | on                            |
| MS Peptide Model for Excluded Isotope Clusters             | preferred                     |

| Time[mm:ss] | Duration[mm:ss] | Flow[nl/min] | Mixture[%B] |
|-------------|-----------------|--------------|-------------|
| 00:00       | 00:00           | 400          | 5           |
| 215:00      | 215:00          | 400          | 30          |
| 220:00      | 05:00           | 400          | 60          |
| 225:00      | 05:00           | 400          | 95          |
| 230:00      | 05:00           | 400          | 95          |
| 235:00      | 05:00           | 400          | 5           |
| 240:00      | 05:00           | 400          | 5           |

| Parameter                                        | Value                                                                                            |
|--------------------------------------------------|--------------------------------------------------------------------------------------------------|
| Version                                          | 1.6.5.0                                                                                          |
| User name                                        | asokol                                                                                           |
| Machine name                                     | KI-S0114                                                                                         |
| Date of writing                                  | 05/21/2019 13:05:55                                                                              |
| Include contaminants                             | True                                                                                             |
| PSM FDR                                          | 0.01                                                                                             |
| PSM FDR Crosslink                                | 0.01                                                                                             |
| Protein FDR                                      | 0.01                                                                                             |
| Site FDR                                         | 0.01                                                                                             |
| Use Normalized Ratios For Occupancy              | True                                                                                             |
| Min. peptide Length                              | 7                                                                                                |
| Min. score for unmodified peptides               | 0                                                                                                |
| Min. score for modified peptides                 | 40                                                                                               |
| Min. delta score for unmodified peptides         | 0                                                                                                |
| Min. delta score for modified peptides           | 6                                                                                                |
| Min. unique peptides                             | 0                                                                                                |
| Min. razor peptides                              | 1                                                                                                |
| Min. peptides                                    | 1                                                                                                |
| Use only unmodified peptides and                 | True                                                                                             |
| Modifications included in protein quantification | Oxidation (M);Acetyl (Protein N-term)                                                            |
| Peptides used for protein quantification         | Razor                                                                                            |
| Discard unmodified counterpart peptides          | True                                                                                             |
| Label min. ratio count                           | 2                                                                                                |
| Use delta score                                  | False                                                                                            |
| iBAQ                                             | False                                                                                            |
| iBAQ log fit                                     | False                                                                                            |
| Match between runs                               | True                                                                                             |
| Matching time window [min]                       | 0.7                                                                                              |
| Match ion mobility window [indices]              | 0.05                                                                                             |
| Alignment time window [min]                      | 20                                                                                               |
| Alignment ion mobility window [indices]          | 1                                                                                                |
| Find dependent peptides                          | False                                                                                            |
| Fasta file                                       | \\ki-s0147.kerckhoff.mpg.de\AG-Proteomics\$\Fasta<br>2019\20190123\Human_9606_canonical+isoforms |
| Decoy mode                                       | revert                                                                                           |
| Include contaminants                             | True                                                                                             |
| Advanced ratios                                  | True                                                                                             |
| Fixed andromeda index folder                     |                                                                                                  |
| Temporary folder                                 |                                                                                                  |
| Combined folder location                         |                                                                                                  |
| Second peptides                                  | True                                                                                             |
| Stabilize large Lfq ratios                       | True                                                                                             |
| Separate Lfq in parameter groups                 | False                                                                                            |
| Require MS/MS for Lfq comparisons                | True                                                                                             |
| Calculate peak properties                        | False                                                                                            |
| Main search max. combinations                    | 200                                                                                              |
| Advanced site intensities                        | True                                                                                             |

|                                           |        |
|-------------------------------------------|--------|
| Write msScans table                       | False  |
| Write msmsScans table                     | True   |
| Write ms3Scans table                      | True   |
| Write allPeptides table                   | True   |
| Write mzRange table                       | True   |
| Write pasefMsmsScans table                | True   |
| Write accumulatedPasefMsmsScans table     | True   |
| Max. peptide mass [Da]                    | 4600   |
| Min. peptide length for unspecific search | 8      |
| Max. peptide length for unspecific search | 25     |
| Razor protein FDR                         | True   |
| Disable MD5                               | False  |
| Max mods in site table                    | 3      |
| Match unidentified features               | False  |
| Epsilon score for mutations               |        |
| Evaluate variant peptides separately      | True   |
| Variation mode                            | None   |
| MS/MS tol. (FTMS)                         | 20 ppm |
| Top MS/MS peaks per Da interval. (FTMS)   | 12     |
| Da interval. (FTMS)                       | 100    |
| MS/MS deisotoping (FTMS)                  | True   |
| MS/MS deisotoping tolerance (FTMS)        | 7      |
| MS/MS deisotoping tolerance unit (FTMS)   | ppm    |
| MS/MS higher charges (FTMS)               | True   |
| MS/MS water loss (FTMS)                   | True   |
| MS/MS ammonia loss (FTMS)                 | True   |
| MS/MS dependent losses (FTMS)             | True   |
| MS/MS recalibration (FTMS)                | False  |
| MS/MS tol. (ITMS)                         | 0.5 Da |
| Top MS/MS peaks per Da interval. (ITMS)   | 8      |
| Da interval. (ITMS)                       | 100    |
| MS/MS deisotoping (ITMS)                  | False  |
| MS/MS deisotoping tolerance (ITMS)        | 0.15   |
| MS/MS deisotoping tolerance unit (ITMS)   | Da     |
| MS/MS higher charges (ITMS)               | True   |
| MS/MS water loss (ITMS)                   | True   |
| MS/MS ammonia loss (ITMS)                 | True   |
| MS/MS dependent losses (ITMS)             | True   |
| MS/MS recalibration (ITMS)                | False  |
| MS/MS tol. (TOF)                          | 40 ppm |
| Top MS/MS peaks per Da interval. (TOF)    | 10     |
| Da interval. (TOF)                        | 100    |
| MS/MS deisotoping (TOF)                   | True   |
| MS/MS deisotoping tolerance (TOF)         | 0.01   |
| MS/MS deisotoping tolerance unit (TOF)    | Da     |
| MS/MS higher charges (TOF)                | True   |
| MS/MS water loss (TOF)                    | True   |
| MS/MS ammonia loss (TOF)                  | True   |

|                                            |                        |
|--------------------------------------------|------------------------|
| MS/MS dependent losses (TOF)               | True                   |
| MS/MS recalibration (TOF)                  | False                  |
| MS/MS tol. (Unknown)                       | 0.5 Da                 |
| Top MS/MS peaks per Da interval. (Unknown) | 8                      |
| Da interval. (Unknown)                     | 100                    |
| MS/MS deisotoping (Unknown)                | False                  |
| MS/MS deisotoping tolerance (Unknown)      | 0.15                   |
| MS/MS deisotoping tolerance unit (Unknown) | Da                     |
| MS/MS higher charges (Unknown)             | True                   |
| MS/MS water loss (Unknown)                 | True                   |
| MS/MS ammonia loss (Unknown)               | True                   |
| MS/MS dependent losses (Unknown)           | True                   |
| MS/MS recalibration (Unknown)              | False                  |
| Site tables                                | Oxidation (M)Sites.txt |
