# Supplementary material for: Epigenetically silenced apoptosis-associated tyrosine kinase (AATK) facilitates a decreased expression of Cyclin D1 and WEE1, phosphorylates TP53 and reduces cell proliferation in a kinase-dependent manner
Source: PubMed Central journal article supplement (PMC9750878; doi:10.1038/s41417-022-00513-x), 2022-07-28

Blot 5C

AATK

TP53

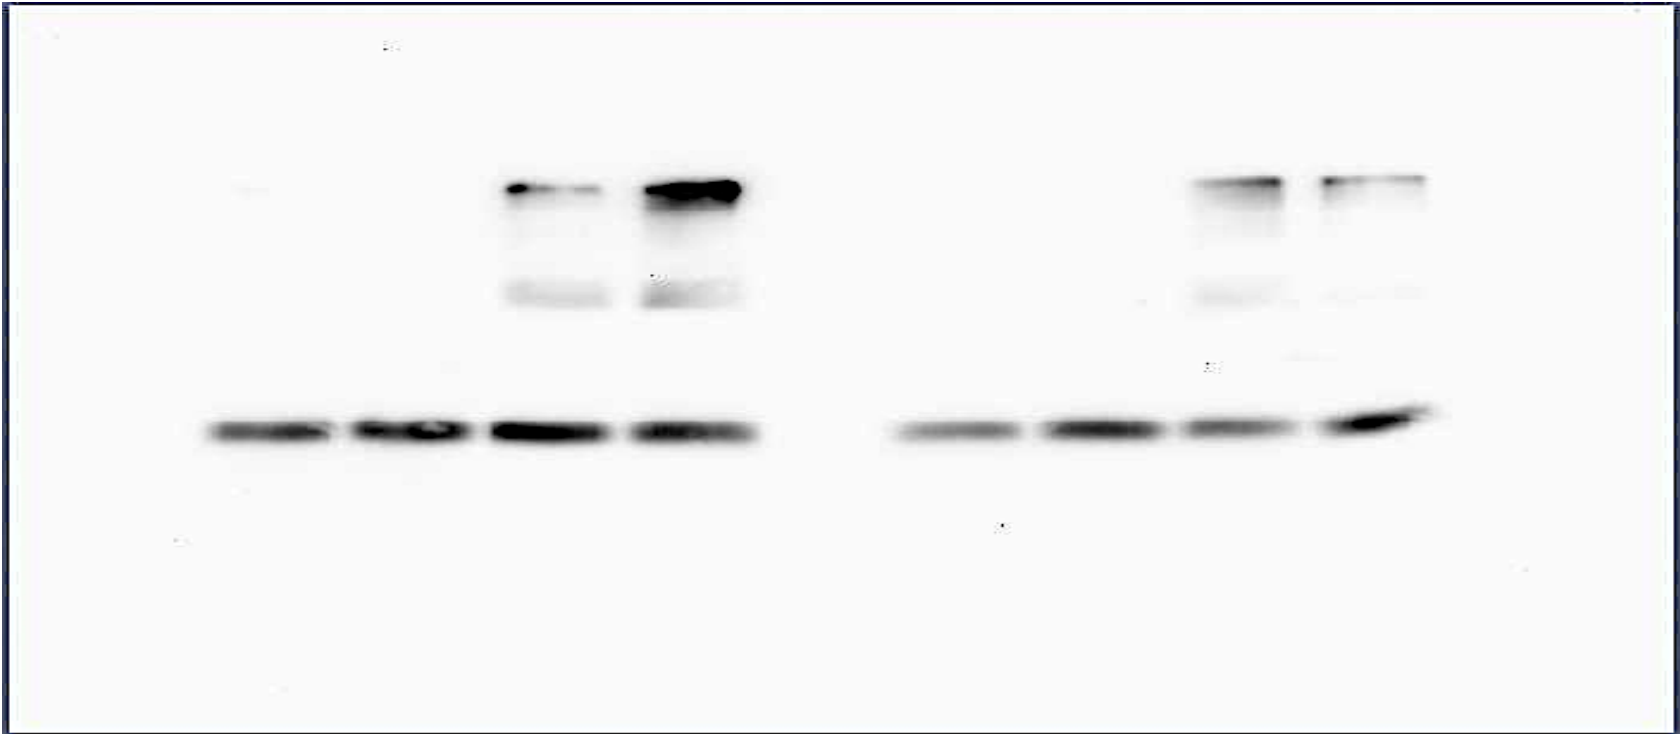

Blot 5C

pTP53 Ser366

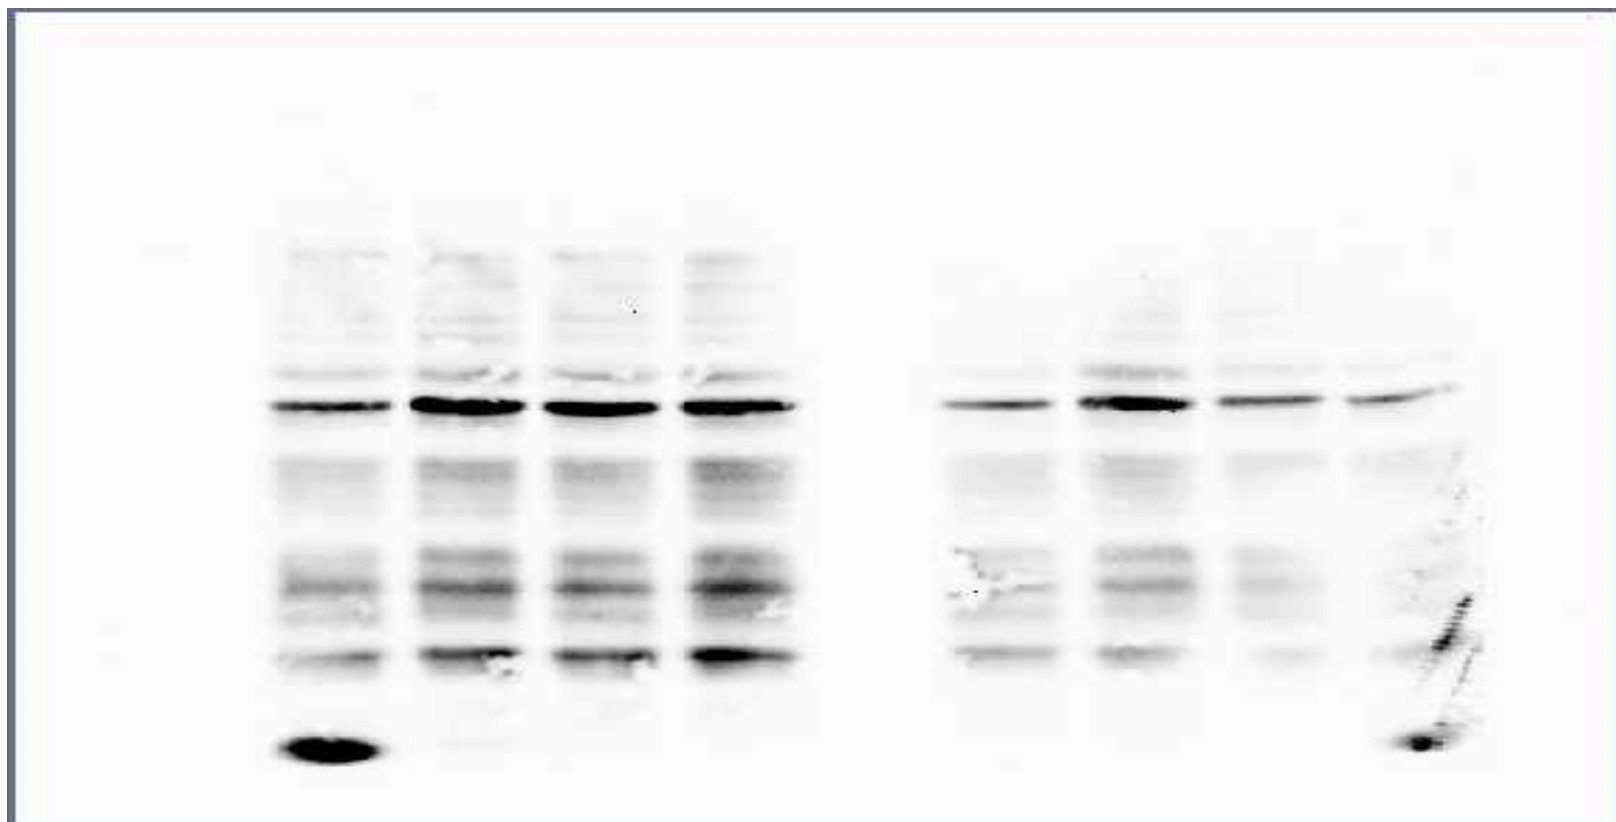

Blot 5C

$\alpha$ Tubulin

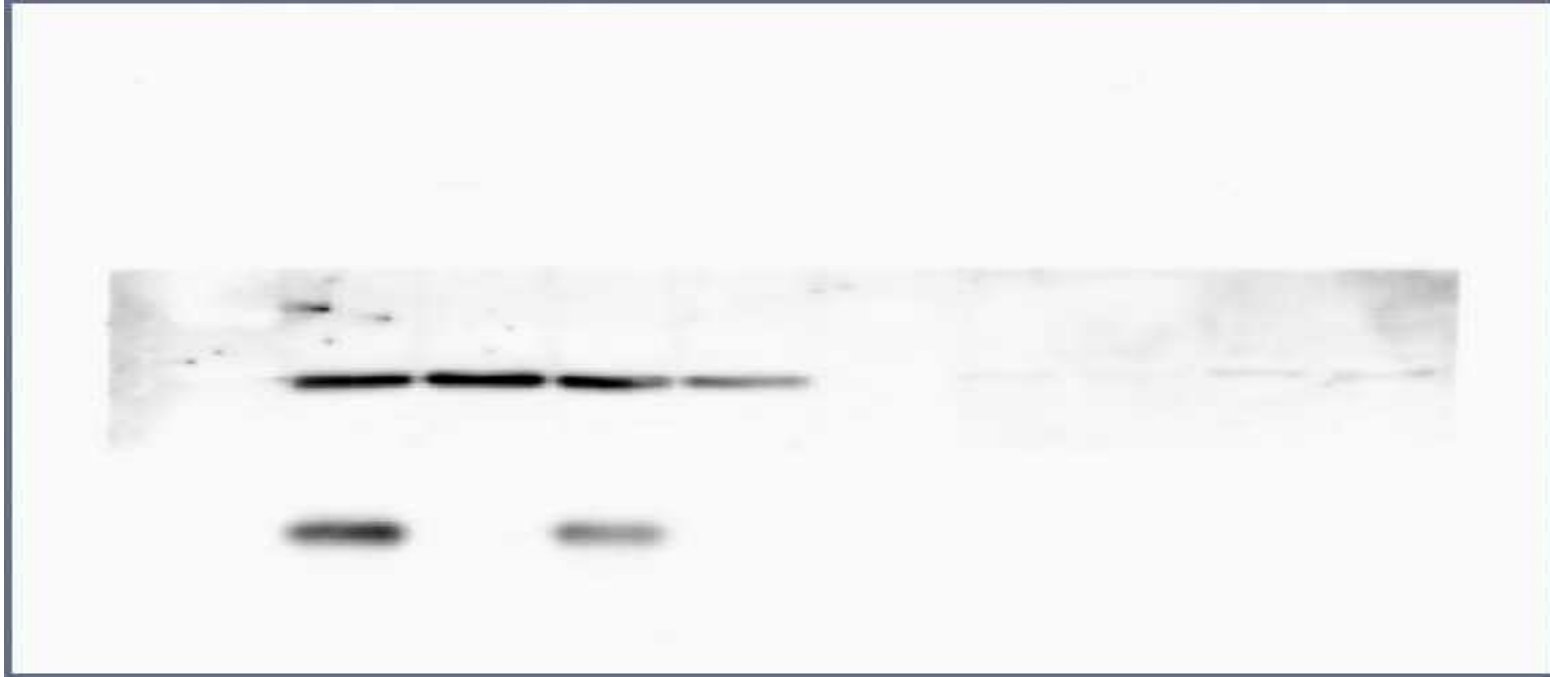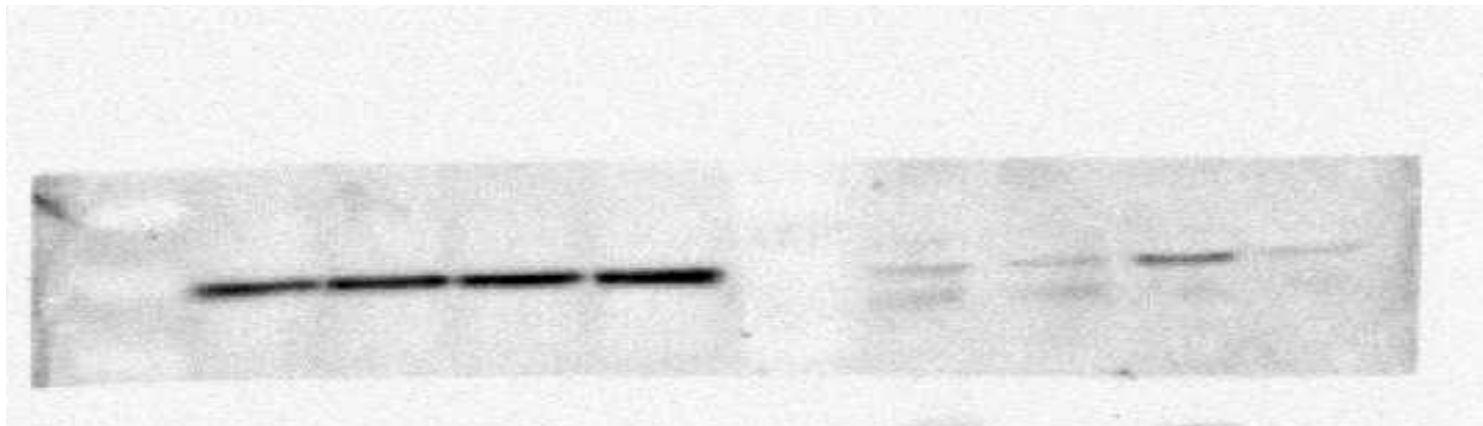

Blot 5C

GFP

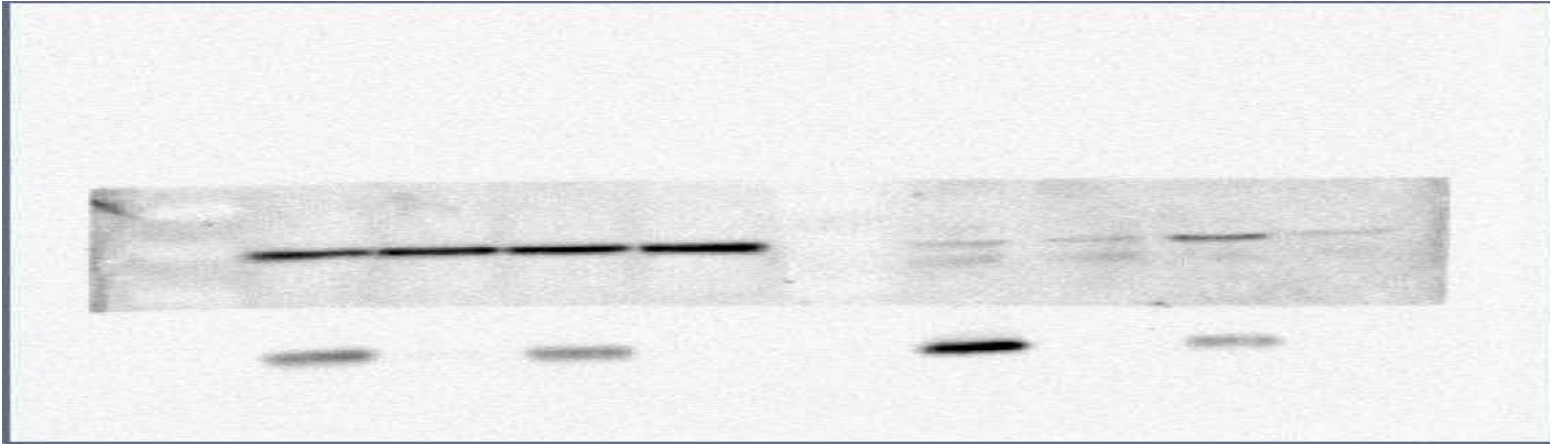

Blot 5D Input

AATK

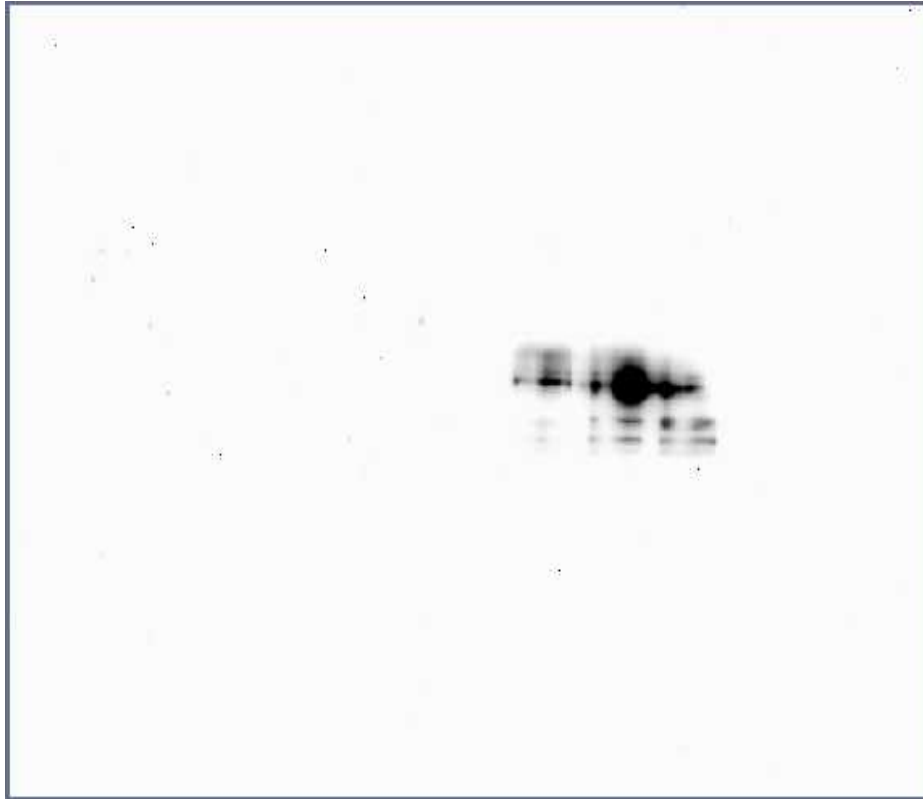

$\alpha$ Tubulin

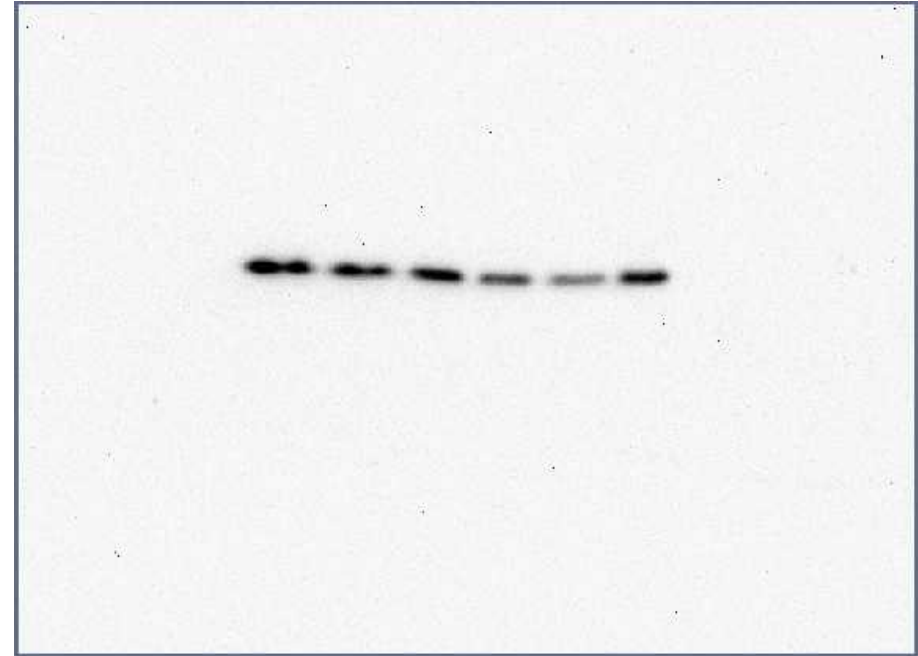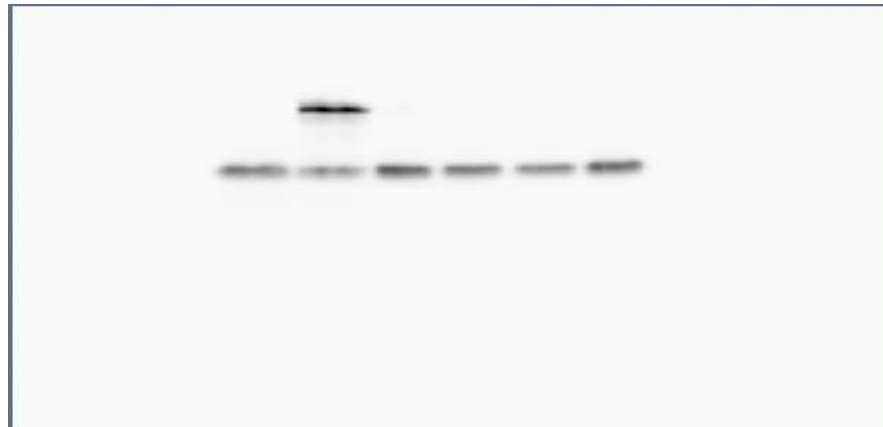

TP53-GFP

TP53

Blot 5D in vitro kinase assay

AATK

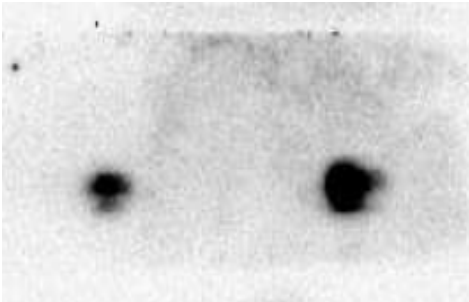

pTP53-Ser366

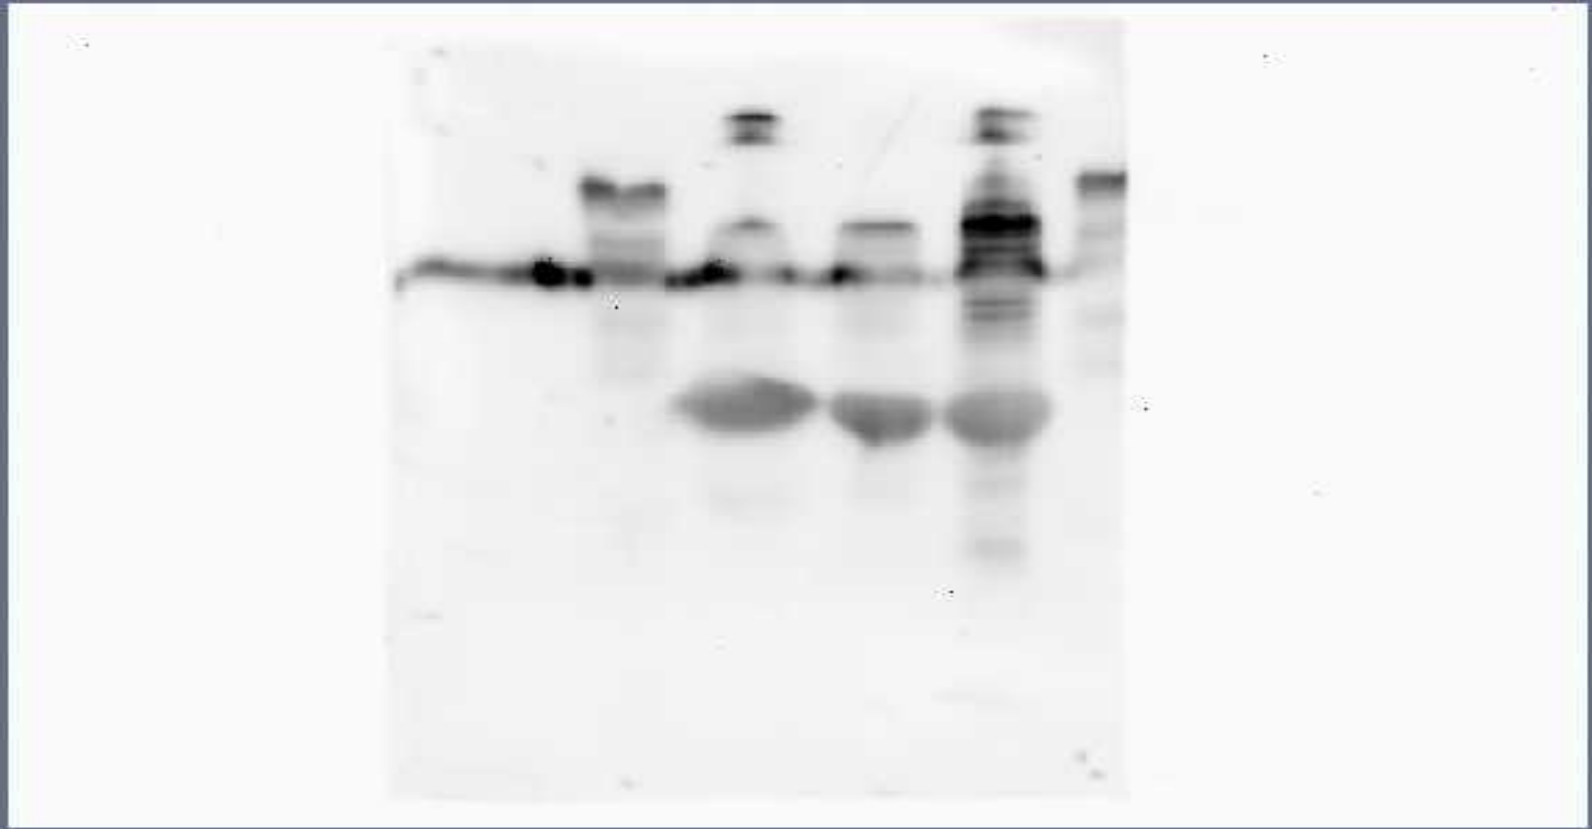

Blot 5D in vitro kinase assay

TP53

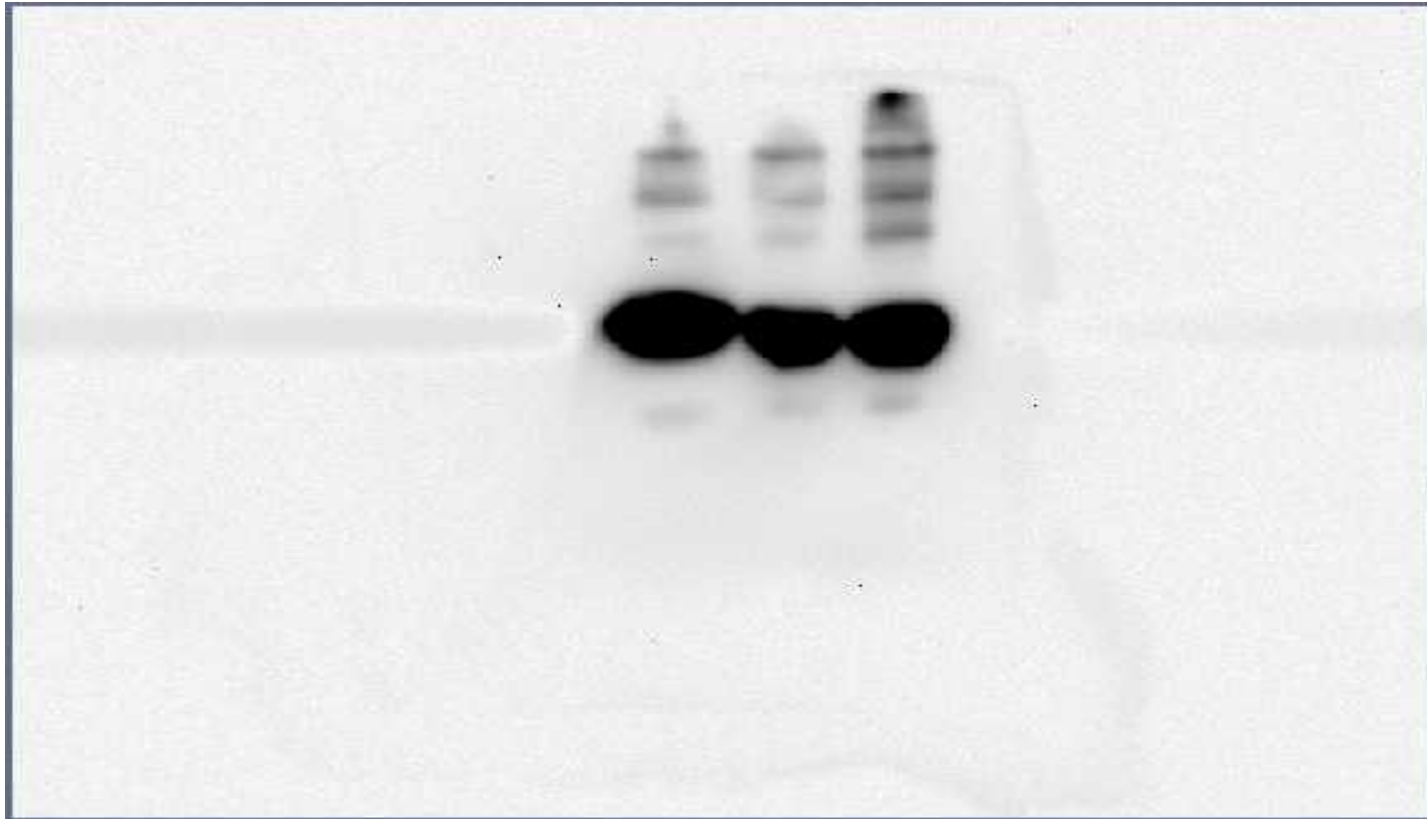

Supplement: 41417_2022_513_MOESM4_ESM.pdf [file 41417_2022_513_MOESM4_ESM.pdf]
