# Supplementary material for: Epigenetically silenced apoptosis-associated tyrosine kinase (AATK) facilitates a decreased expression of Cyclin D1 and WEE1, phosphorylates TP53 and reduces cell proliferation in a kinase-dependent manner
Source: PubMed Central journal article supplement (PMC9750878; doi:10.1038/s41417-022-00513-x), 2022-07-28

Sample Name: 24\_3\_AATKgDNAF1  
Mobility: KB\_3730\_POP7\_BDTv3.mob  
Spacing: 14.3174  
Comment: 42422218

Signal Strengths: A = 552, C = 1157, G = 962, T = 302  
Lane/Cap#: 32  
Matrix: n/a  
Direction: Native

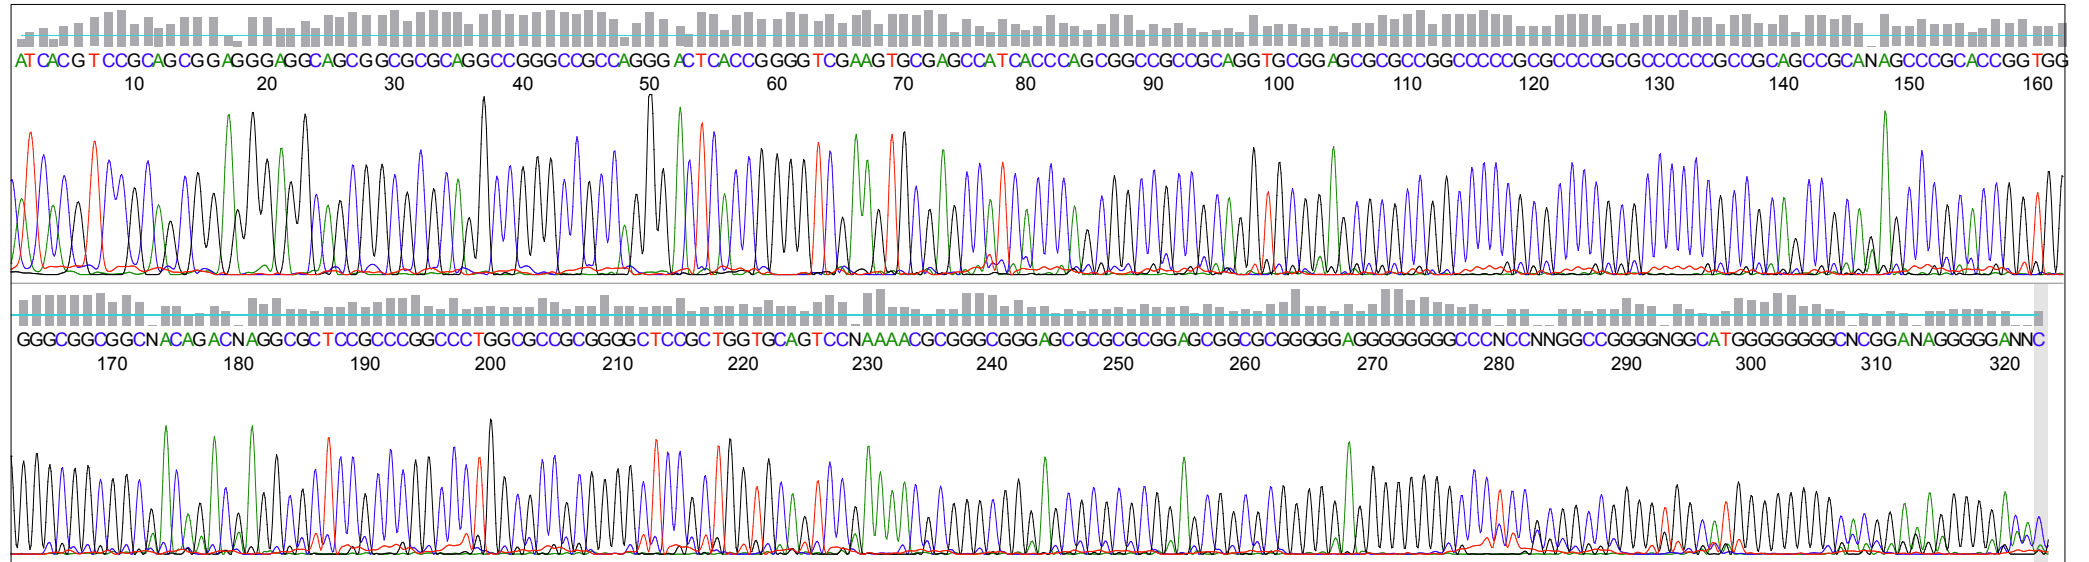



Sample Name: 24\_5\_AATKgDNAF1  
Mobility: KB\_3730\_POP7\_BDTv3.mob  
Spacing: 14.3699  
Comment: 42422220

Signal Strengths: A = 418, C = 823, G = 699, T = 236  
Lane/Cap#: 45  
Matrix: n/a  
Direction: Native

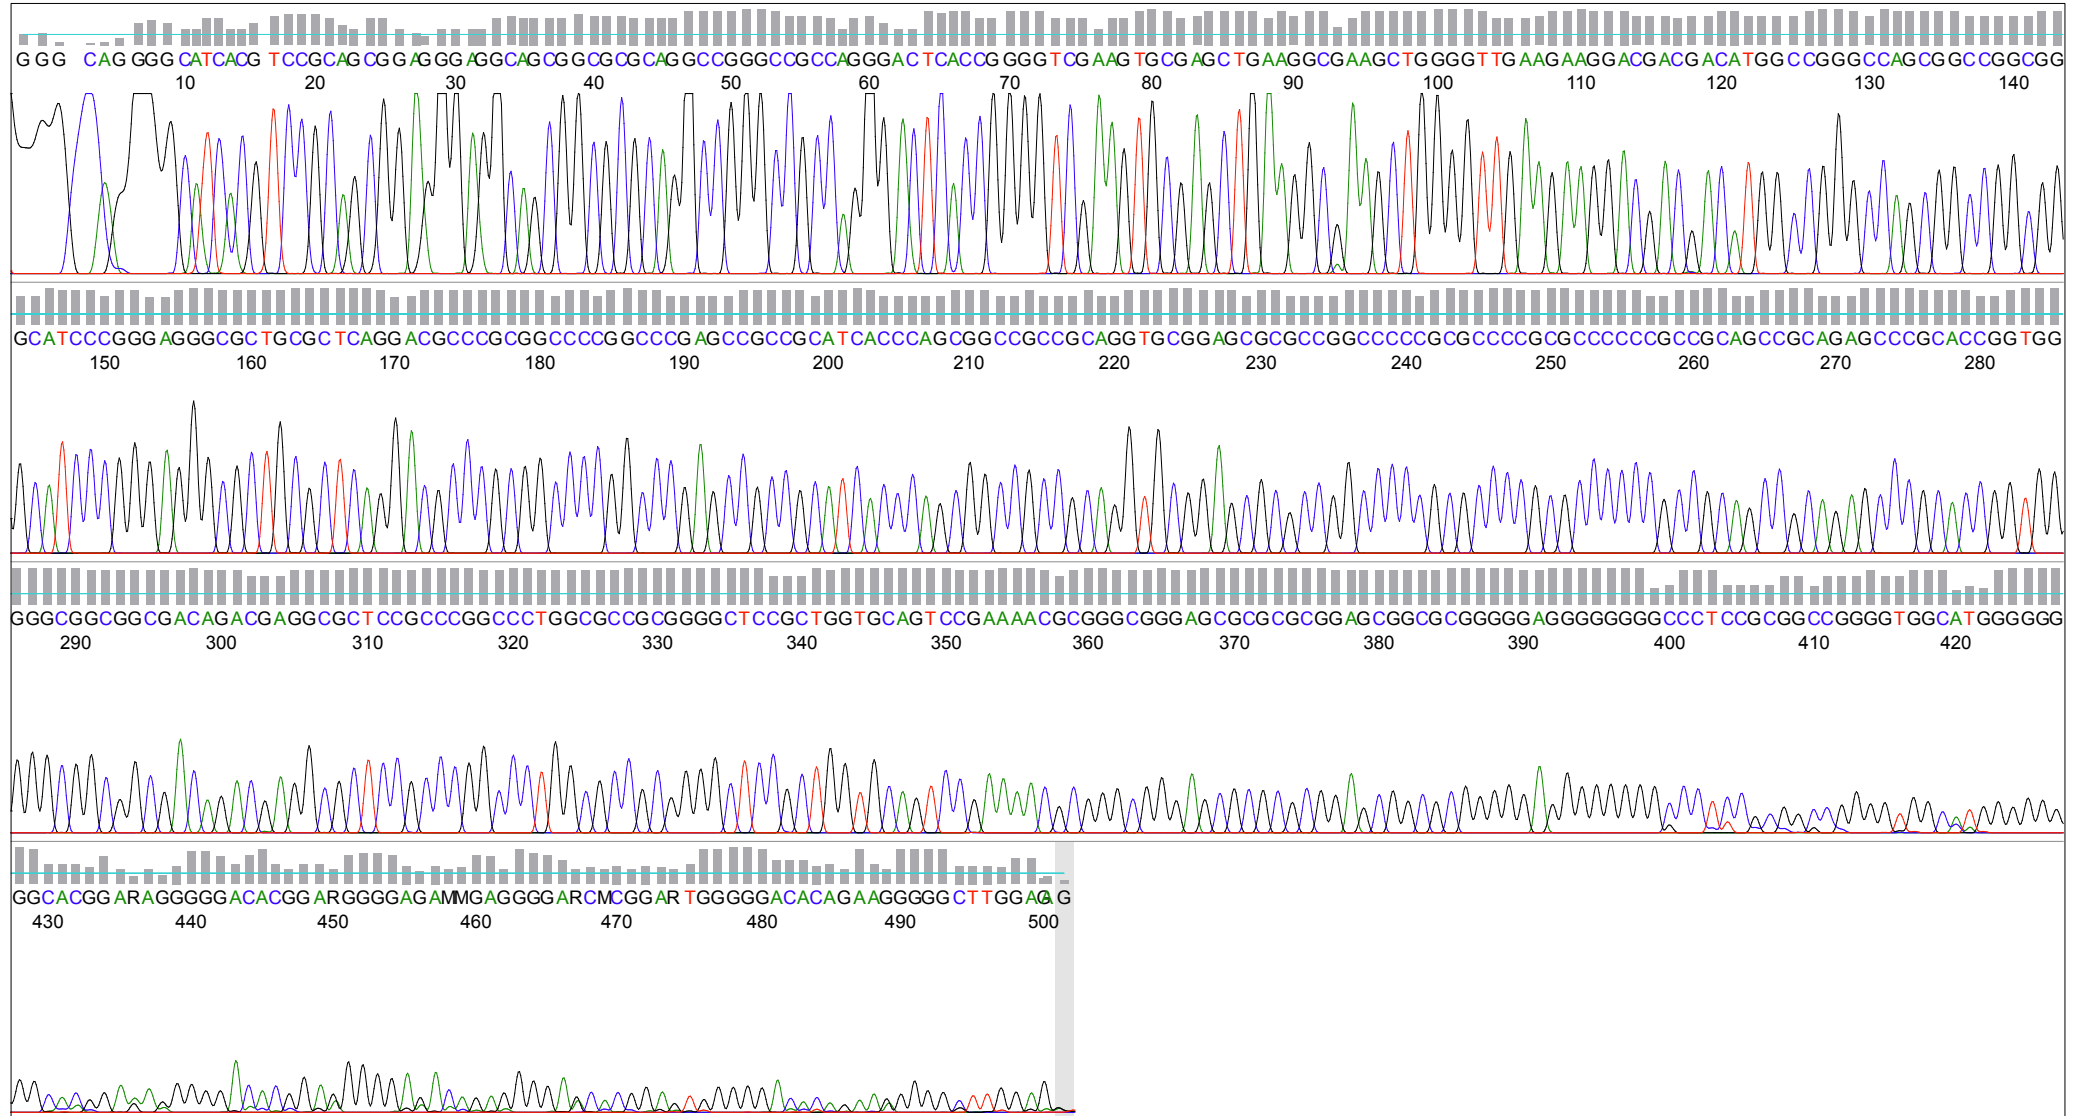

Sample Name: 48\_3\_AATKgDNAF1  
Mobility: KB\_3730\_POP7\_BDTv3.mob  
Spacing: 14.2645  
Comment: 42422223

Signal Strengths: A = 1646, C = 3704, G = 2891, T = 884  
Lane/Cap#: 30  
Matrix: n/a  
Direction: Native

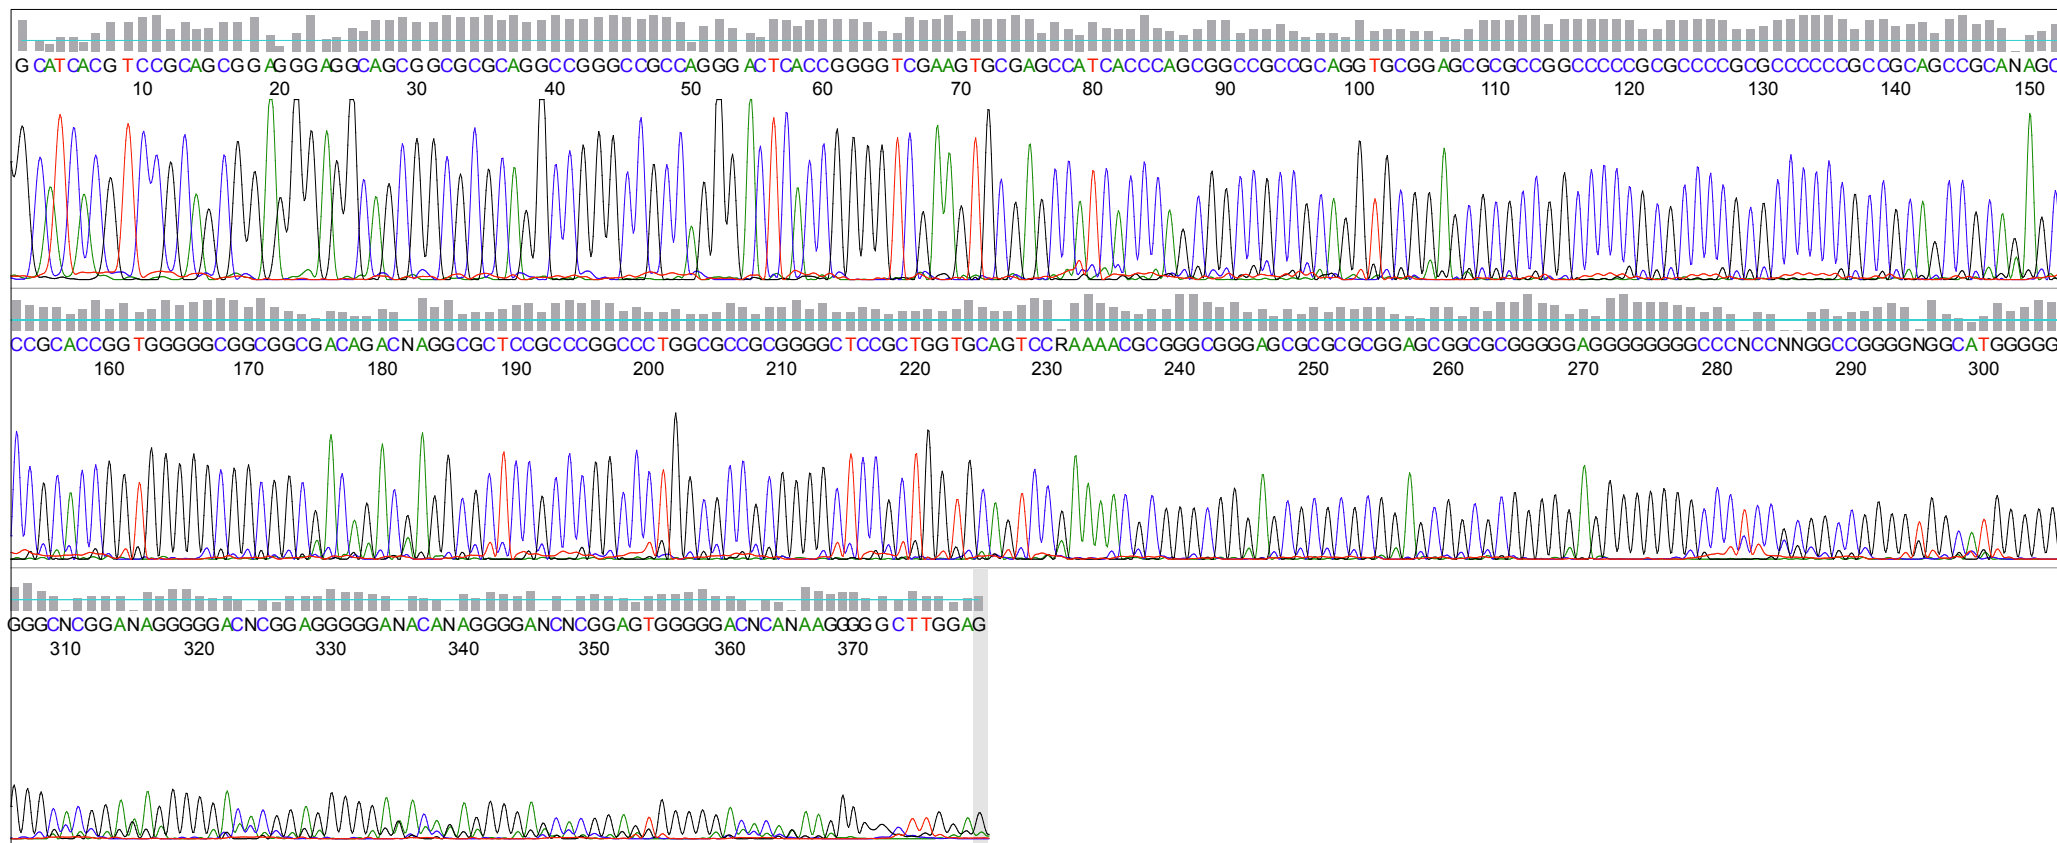

Sample Name: 24\_1\_AATKgDNAF1  
Mobility: KB\_3730\_POP7\_BDTv3.mob  
Spacing: 14.3239  
Comment: 42422216

Signal Strengths: A = 230, C = 494, G = 417, T = 135  
Lane/Cap#: 43  
Matrix: n/a  
Direction: Native

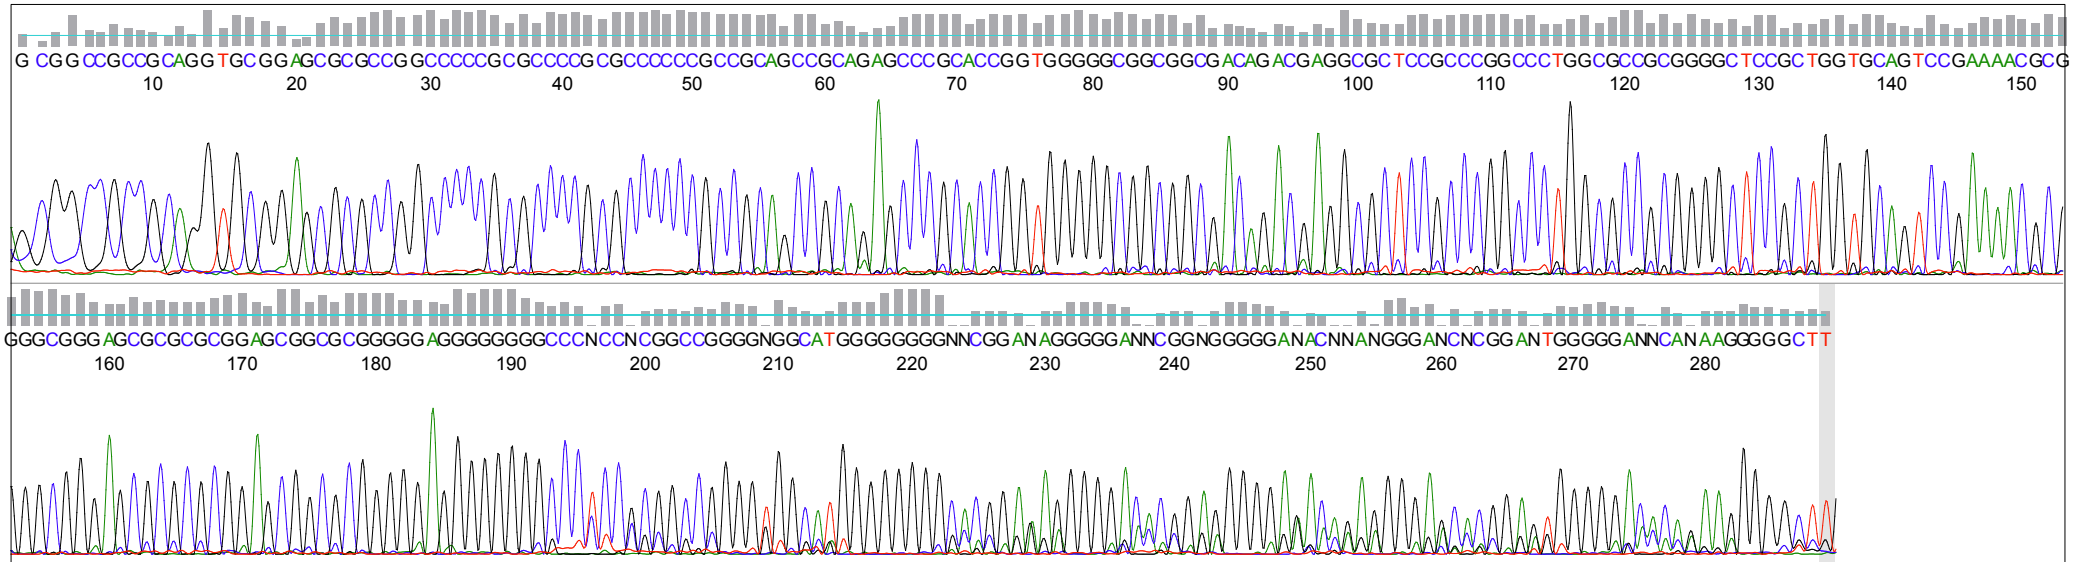

Supplement: 41417_2022_513_MOESM5_ESM.pdf [file 41417_2022_513_MOESM5_ESM.pdf]
